# Supplementary material
Source: Springer Nature journal article supplement (https://www.springermedizin.de/resource/supplementary/13048_2009_33_MOESM5_ESM.pdf/9664804)

IL-1 beta mRNA expression

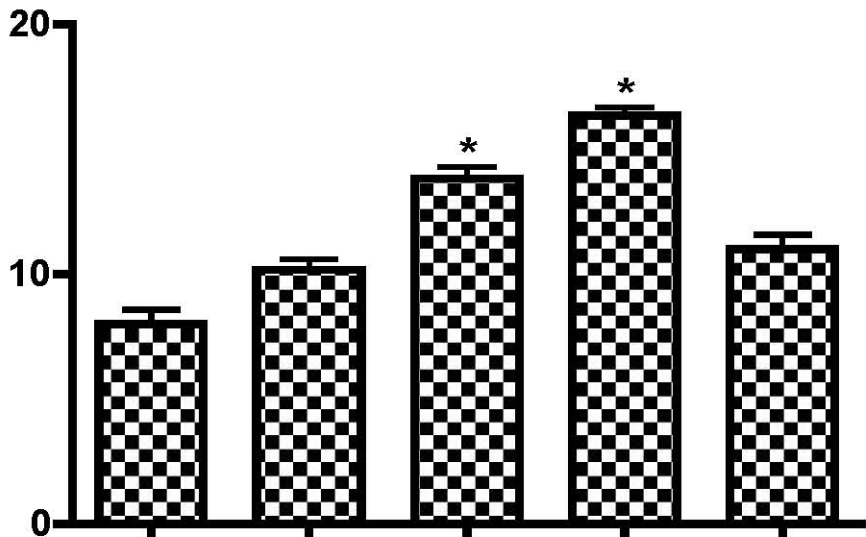

Primary EC

RL952

TOV-112D

OV-90

TOV-21G

Cell types

Supplement: MOESM5 [file 9664804]
